# Supplementary material for: Prevalence of TECTA mutation in patients with mid-frequency sensorineural hearing loss
Source: Orphanet J Rare Dis. 2017 Sep 25;12:157. doi: 10.1186/s13023-017-0708-z (PMC5613382; doi:10.1186/s13023-017-0708-z)
Supplement: Supplementary file 3 — A breakdown list of species used for evaluation of amino acid conservation. A table describing the breakdown list of species used for evaluation of amino acid conservation in this study. (XLSX 14 kb) [file 13023_2017_708_MOESM3_ESM.xlsx]

## Sheet: Sheet1
	Additional file 3. A breakdown list of species used for evaluation of amino acid conservation
	Primate species			Mammal species			Vertebrates pecies
	Organism	Species		Organism	Species		Organism	Species
	Baboon	Papio hamadryas		Brush-tailed rat	Octodon degus		Budgerigar	Melopsittacus undulatus
	Bushbaby	Otolemur garnettii		Chinchilla	Chinchilla lanigera		Chicken	Gallus gallus
	Chimp	Pan troglodytes		Chinese hamster	Cricetulus griseus		Collared flycatcher	Ficedula albicollis
	Crab-eating macaque	Macaca fascicularis		Chinese tree shrew	Tupaia chinensis		Mallard duck	Anas platyrhynchos
	Gibbon	Nomascus leucogenys		Golden hamster	Mesocricetus auratus		Medium ground finch	Geospiza fortis
	Gorilla	Gorilla gorilla gorilla		Guinea pig	Cavia porcellus		Parrot	Amazona vittata
	Green monkey	Chlorocebus sabaeus		Lesser Egyptian jerboa	Jaculus jaculus		Peregrine falcon	Falco peregrinus
	Human	Homo sapiens		Mouse	Mus musculus		Rock pigeon	Columba livia
	Marmoset	Callithrix jacchus		Naked mole-rat	Heterocephalus glaber		Saker falcon	Falco cherrug
	Orangutan	Pongo pygmaeus abelii		Pika	Ochotona princeps		Scarlet macaw	Ara macao
	Rhesus	Macaca mulatta		Prairie vole	Microtus ochrogaster		Tibetan ground jay	Pseudopodoces humilis
	Squirrel monkey	Saimiri boliviensis		Rabbit	Oryctolagus cuniculus		Turkey	Meleagris gallopavo
				Rat	Rattus norvegicus		White-throated sparrow	Zonotrichia albicollis
				Squirrel	Spermophilus tridecemlineatus		Zebra finch	Taeniopygia guttata
				Alpaca	Vicugna pacos		American alligator	Alligator mississippiensis
				Bactrian camel	Camelus ferus		Chinese softshell turtle	Pelodiscus sinensis
				Big brown bat	Eptesicus fuscus		Coelacanth	Latimeria chalumnae
				Black flying-fox	Pteropus alecto		Green seaturtle	Chelonia mydas
				Cat	Felis catus		Lizard	Anolis carolinensis
				Cow	Bos taurus		Painted turtle	Chrysemys picta bellii
				David's myotis bat	Myotis davidii		Spiny softshell turtle	Apalone spinifera
				Dog	Canis lupus familiaris		X. tropicalis	Xenopus tropicalis
				Dolphin	Tursiops truncatus		Atlantic cod	Gadus morhua
				Domestic goat	Capra hircus		Burton's mouthbreeder	Haplochromis burtoni
				Ferret	Mustela putorius furo		Fugu	Takifugu rubripes
				Hedgehog	Erinaceus europaeus		Lamprey	Petromyzon marinus
				Horse	Equus caballus		Medaka	Oryzias latipes
				Killer whale	Orcinus orca		Mexican tetra (cavefish)	Astyanax mexicanus
				Megabat	Pteropus vampyrus		Nile tilapia	Oreochromis niloticus
				Microbat	Myotis lucifugus		Princess of Burundi	Neolamprologus brichardi
				Pacific walrus	Odobenus rosmarus divergens		Pundamilia nyererei	Pundamilia nyererei
				Panda	Ailuropoda melanoleuca		Southern platyfish	Xiphophorus maculatus
				Pig	Sus scrofa		Spotted gar	Lepisosteus oculatus
				Sheep	Ovis aries		Stickleback	Gasterosteus aculeatus
				Shrew	Sorex araneus		Tetraodon	Tetraodon nigroviridis
				Star-nosed mole	Condylura cristata		Yellowbelly pufferfish	Takifugu flavidus
				Tibetan antelope	Pantholops hodgsonii		Zebra mbuna	Maylandia zebra
				Weddell seal	Leptonychotes weddellii		Zebrafish
				White rhinoceros	Ceratotherium simum
				Aardvark	Orycteropus afer afer
				Cape elephant shrew	Elephantulus edwardii
				Cape golden mole	Chrysochloris asiatica
				Elephant	Loxodonta africana
				Manatee	Trichechus manatus latirostris
				Tenrec	Echinops telfairi
				Armadillo	Dasypus novemcinctus
				Opossum	Monodelphis domestica
				Platypus	Ornithorhynchus anatinus
				Tasmanian devil	Sarcophilus harrisii
				Wallaby	Macropus eugenii
